# Supplementary material for: Highly sensitive electrochemical sensor for simultaneous determination of dihydroxybenzene isomers based on Co doped SnO2 nanoparticles
Source: Royal Society of Chemistry journal article supplement (doi:10.1039/c6ra06056k), 2016-01-01
Supplement: c6ra06056k1.pdf [file c6ra06056k1.pdf]

**Highly Sensitive electrochemical sensor for simultaneous determination of  
dihydroxybenzene isomers based on Co doped SnO<sub>2</sub> nanoparticles**

**N. Lavanya, C. Sekar\***

Department of Bioelectronics and Biosensors, Alagappa University, Karaikudi-630 003,  
Tamilnadu, India.

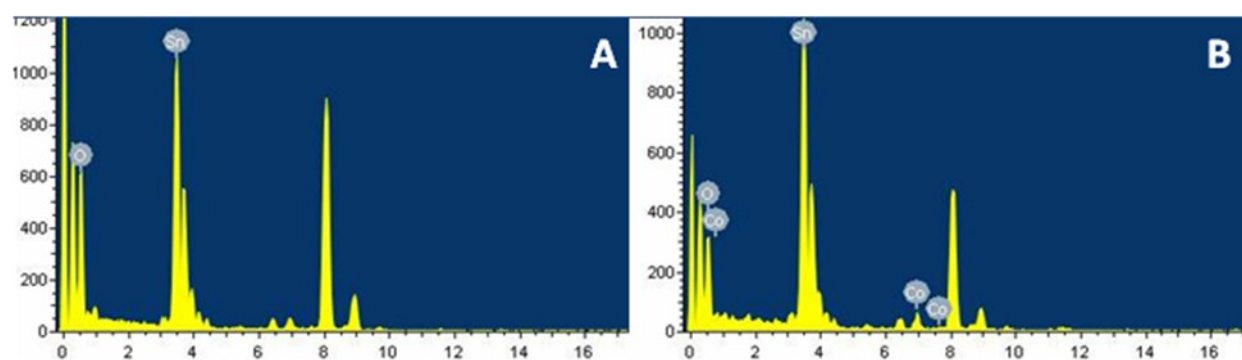

**Fig.S1** EDAX spectra of (A) pristine and (B) 3wt% Co doped SnO<sub>2</sub> nanoparticles

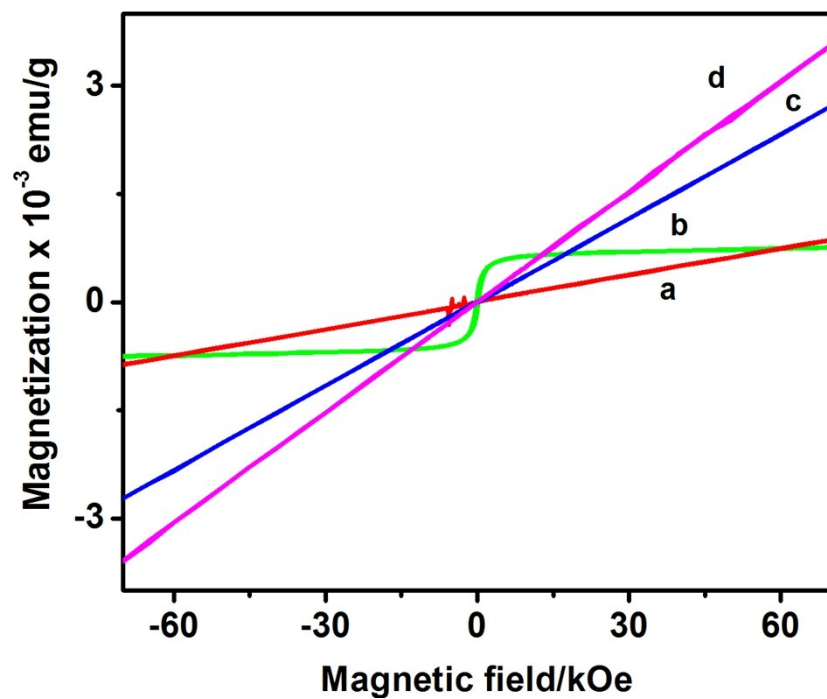

**Fig. S2.** Magnetization (M) vs. magnetic field (H) curves obtained for (a) 1wt%, (b) 3wt% (c) 5wt% and (d) 10wt% of Co doped  $\text{SnO}_2$  NPs.

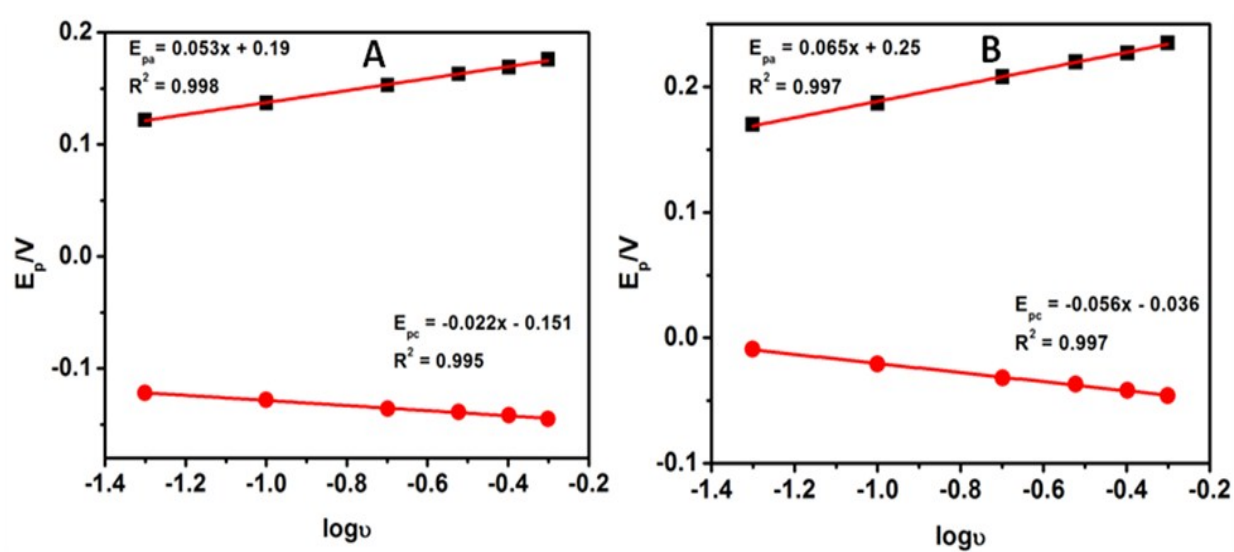

**Fig. S3** Plots of oxidation and reduction peak current vs logirathm of the scan rate (0.05 -0.5 V/s).

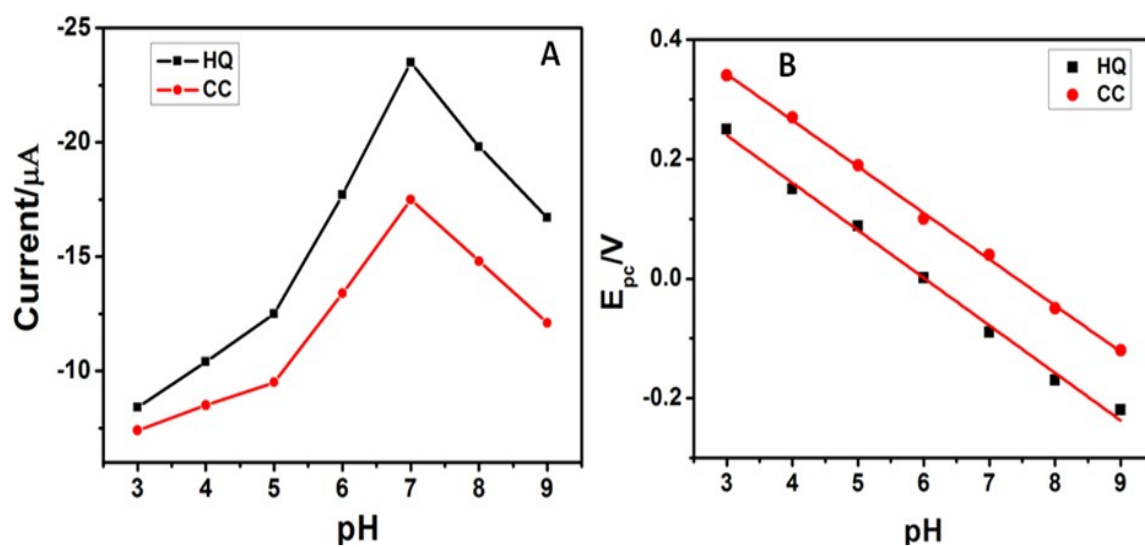

**Fig. S4** Effect of pH on (A) SWV peak currents and (B) peak potentials for the oxidation of 500  $\mu\text{M}$  HQ and 100  $\mu\text{M}$  CC in 0.1 M PBS.

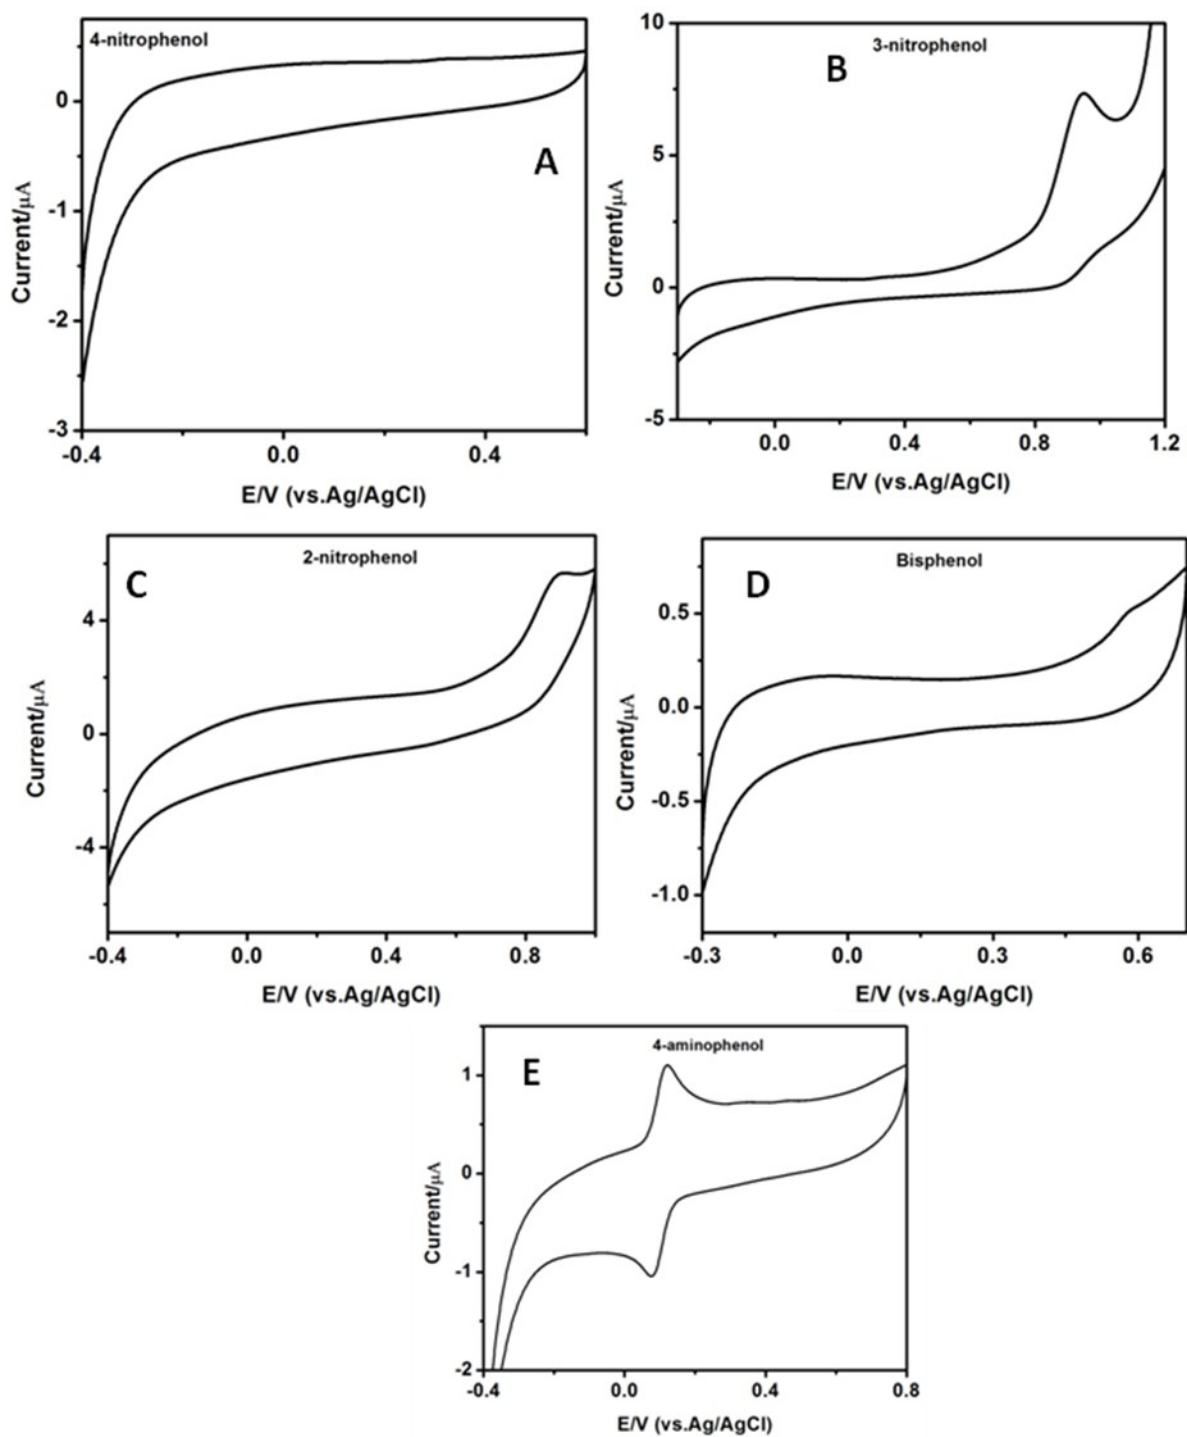

**Fig.S5** shows CV obtained for (A) 4-nitrophenol, (B) 3-nitrophenol, (C) 2-nitrophenol, (D) bisphenol and (E) 4-aminophenol at Co-SnO<sub>2</sub>/GCE.
